# Supplementary material for: Onset of Immune Senescence Defined by Unbiased Pyrosequencing of Human Immunoglobulin mRNA Repertoires
Source: PubMed Central journal article supplement (PMC3511497; doi:10.1371/journal.pone.0049774), 2012-11-30
Supplement: pone.0049774.s002.pdf [file pone.0049774.s002.pdf]

**Figure S2. VDJ rearrangements 100-fold over the median frequency of all VDJ recombination patterns within the cohort.**

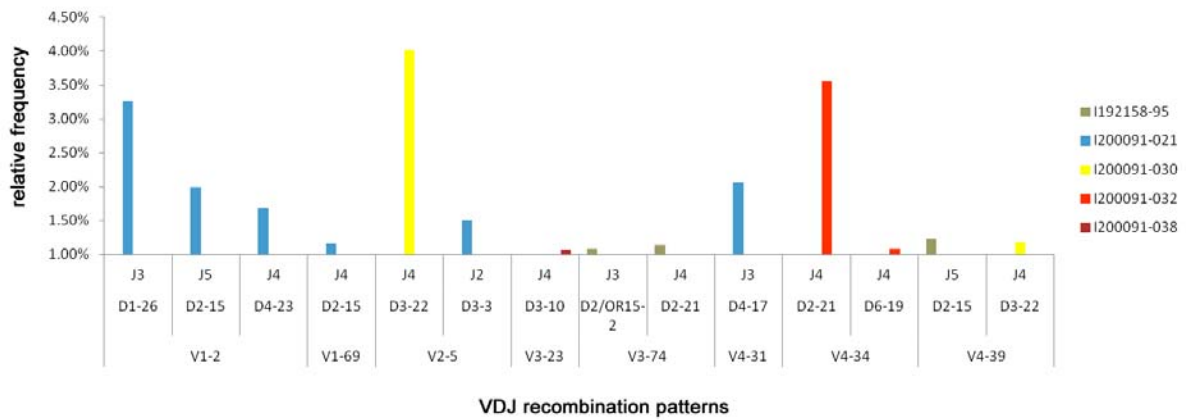

Graph represents all individual VDJ rearrangements with a frequency >1.07 % of all donors.
