# Supplementary material for: Onset of Immune Senescence Defined by Unbiased Pyrosequencing of Human Immunoglobulin mRNA Repertoires
Source: PubMed Central journal article supplement (PMC3511497; doi:10.1371/journal.pone.0049774), 2012-11-30
Supplement: pone.0049774.s003.pdf [file pone.0049774.s003.pdf]

**Figure S3. Variability as a function of unique VDJ recombination patterns in each isotype in proportion to all isotypes within donors.**

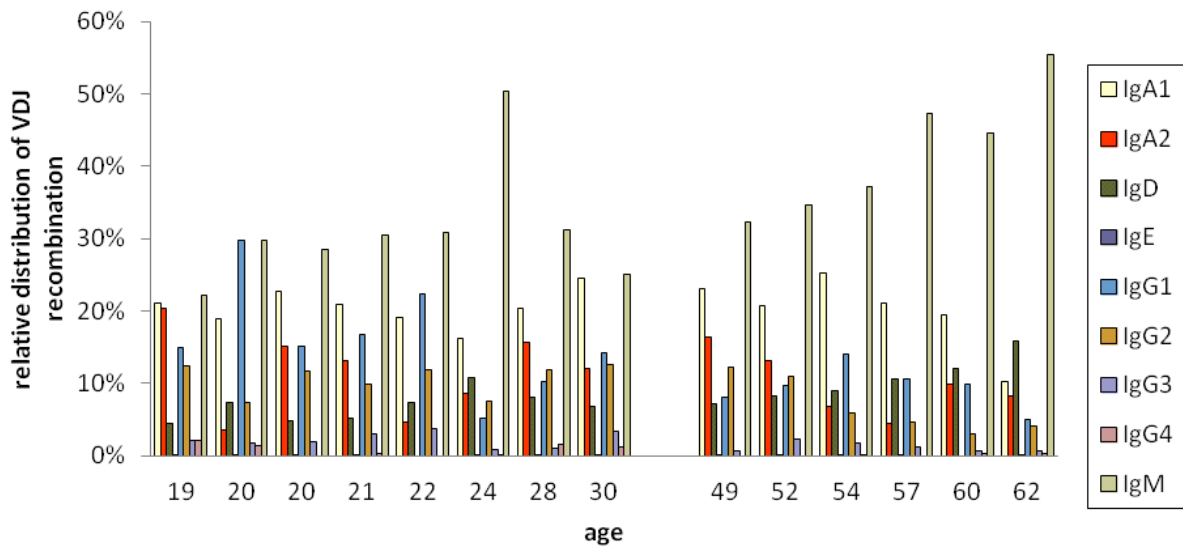

Variability was defined as the percentage of VDJs covered by a distinct antibody type in each donor. The variability  $V_{AD}$  for antibody type A and donor D was calculated from the number of occurring VDJs  $n_{AD}$  and the total number of occurring VDJs in the donor D  $n_D$  as  $n_{AD}/n_D$ .
