# Supplementary material for: Onset of Immune Senescence Defined by Unbiased Pyrosequencing of Human Immunoglobulin mRNA Repertoires
Source: PubMed Central journal article supplement (PMC3511497; doi:10.1371/journal.pone.0049774), 2012-11-30
Supplement: pone.0049774.s010.pdf [file pone.0049774.s010.pdf]

**Table S1. Statistical analysis of relative amount of obtained sequences per isotype over the total number of sequences from all 14 donors.**

| isotypes        | correlation | p-value |
|-----------------|-------------|---------|
| IgA1            | -0.20284    | 0.48675 |
| IgA2            | -0.32861    | 0.25132 |
| IgD             | 0.58232     | 0.02889 |
| IgE             | 0.24094     | 0.40666 |
| IgG1            | -0.45860    | 0.09908 |
| IgG2            | -0.47966    | 0.08262 |
| IgG3            | -0.43607    | 0.11906 |
| IgG4            | -0.44497    | 0.11086 |
| IgM             | 0.70830     | 0.00458 |
| IgM + IgD       | 0.70644     | 0.00474 |
| IgA + IgE + IgG | -0.70644    | 0.00474 |

For all nine isotypes and groups correlation and p-values according a linear model fit (F-test) were calculated for age dependency.
