# Supplementary material for: Onset of Immune Senescence Defined by Unbiased Pyrosequencing of Human Immunoglobulin mRNA Repertoires
Source: PubMed Central journal article supplement (PMC3511497; doi:10.1371/journal.pone.0049774), 2012-11-30
Supplement: pone.0049774.s011.pdf [file pone.0049774.s011.pdf]

**Table S2. Statistical analysis of relative amount of obtained sequences per isotype over the total number of sequences from the young adult group.**

| <b>isotype</b>  | <b>correlation</b> | <b>p-value</b> |
|-----------------|--------------------|----------------|
| IgA1            | 0.34921            | 0.39651        |
| IgA2            | -0.11493           | 0.78640        |
| IgD             | 0.52678            | 0.17980        |
| IgE             | 0.12509            | 0.76790        |
| IgG1            | -0.37555           | 0.35926        |
| IgG2            | 0.30270            | 0.46615        |
| IgG3            | 0.31290            | 0.45049        |
| IgG4            | 0.35856            | 0.38311        |
| IgM             | 0.22724            | 0.58837        |
| IgM + IgD       | 0.24762            | 0.55434        |
| IgA + IgE + IgG | -0.24762           | 0.55434        |

For all nine isotypes and groups correlation and p-values according a linear model fit (F-test) were calculated for age dependency.
