# Supplementary material for: Onset of Immune Senescence Defined by Unbiased Pyrosequencing of Human Immunoglobulin mRNA Repertoires
Source: PubMed Central journal article supplement (PMC3511497; doi:10.1371/journal.pone.0049774), 2012-11-30
Supplement: pone.0049774.s012.pdf [file pone.0049774.s012.pdf]

**Table S3. Statistical analysis of relative amount of obtained sequences per isotype over the total number of sequences from the elderly group.**

| <b>isotype</b>  | <b>correlation</b> | <b>p-value</b> |
|-----------------|--------------------|----------------|
| IgA1            | -0.56552           | 0.24215        |
| IgA2            | -0.51642           | 0.29423        |
| IgD             | 0.46762            | 0.34970        |
| IgE             | -0.14161           | 0.78901        |
| IgG1            | -0.42357           | 0.40264        |
| IgG2            | -0.86254           | 0.02704        |
| IgG3            | -0.54596           | 0.26243        |
| IgG4            | 0.84907            | 0.03245        |
| IgM             | 0.85822            | 0.02873        |
| IgM + IgD       | 0.85685            | 0.02927        |
| IgA + IgE + IgG | -0.85685           | 0.02927        |

For all nine isotypes and groups correlation and p-values according a linear model fit (F-test) were calculated for age dependency.
