# Supplementary material for: Onset of Immune Senescence Defined by Unbiased Pyrosequencing of Human Immunoglobulin mRNA Repertoires
Source: PubMed Central journal article supplement (PMC3511497; doi:10.1371/journal.pone.0049774), 2012-11-30
Supplement: pone.0049774.s013.pdf [file pone.0049774.s013.pdf]

**Table S4. Unique VDJ recombination per isotype in proportion to all isotypes in all donors.**

| <b>isotypes</b> | <b>correlation</b> | <b>p-value</b> |
|-----------------|--------------------|----------------|
| IgA1            | -0.15983           | 0.58521        |
| IgA2            | -0.23863           | 0.41131        |
| IgD             | 0.73313            | 0.00285        |
| IgE             | 0.23648            | 0.26855        |
| IgG1            | -0.56822           | 0.03401        |
| IgG2            | -0.64336           | 0.01305        |
| IgG3            | -0.54214           | 0.04521        |
| IgG4            | -0.47527           | 0.08928        |
| IgM             | 0.64514            | 0.01272        |
| IgM + IgD       | 0.67501            | 0.00808        |
| IgA + IgE + IgG | -0.67501           | 0.00808        |

Correlations were calculated using the Pearson rank method and linear dependencies were evaluated by standard linear model fits. Significance of the intercept term was then quantified with an F-test.
