# Supplementary material for: Onset of Immune Senescence Defined by Unbiased Pyrosequencing of Human Immunoglobulin mRNA Repertoires
Source: PubMed Central journal article supplement (PMC3511497; doi:10.1371/journal.pone.0049774), 2012-11-30
Supplement: pone.0049774.s014.pdf [file pone.0049774.s014.pdf]

**Table S5. Unique VDJ recombination per isotype in proportion to all isotypes in young donors.**

| <b>isotypes</b> | <b>correlation</b> | <b>p-value</b> |
|-----------------|--------------------|----------------|
| IgA1            | 0.27138            | 0.51560        |
| IgA2            | 0.01206            | 0.97739        |
| IgD             | 0.44763            | 0.26607        |
| IgE             | 0.57430            | 0.17752        |
| IgG1            | -0.45257           | 0.26018        |
| IgG2            | 0.25725            | 0.53852        |
| IgG3            | -0.00097           | 0.99817        |
| IgG4            | -0.02829           | 0.95758        |
| IgM             | 0.11277            | 0.79033        |
| IgM + IgD       | 0.18371            | 0.66321        |
| IgA + IgE + IgG | -0.18371           | 0.66321        |

Correlations were calculated using the Pearson rank method and linear dependencies were evaluated by standard linear model fits. Significance of the intercept term was then quantified with an F-test.
