# Supplementary material for: Onset of Immune Senescence Defined by Unbiased Pyrosequencing of Human Immunoglobulin mRNA Repertoires
Source: PubMed Central journal article supplement (PMC3511497; doi:10.1371/journal.pone.0049774), 2012-11-30
Supplement: pone.0049774.s016.pdf [file pone.0049774.s016.pdf]

**Table S7. Analysis of changes in the VDJ rearrangement pattern distribution by entropy over all donors.**

| <b>isotypes</b> | <b>correlation</b> | <b>p-value</b> |
|-----------------|--------------------|----------------|
| IgA1            | 0.01049            | 0.97160        |
| IgA2            | -0.26130           | 0.36686        |
| IgD             | 0.31680            | 0.26977        |
| IgE             | 0.18646            | 0.94504        |
| IgG1            | -0.44889           | 0.10738        |
| IgG2            | -0.66682           | 0.00920        |
| IgG3            | -0.54034           | 0.04607        |
| IgG4            | -0.36296           | 0.41348        |
| IgM             | 0.33073            | 0.24810        |
