# Supplementary material for: Onset of Immune Senescence Defined by Unbiased Pyrosequencing of Human Immunoglobulin mRNA Repertoires
Source: PubMed Central journal article supplement (PMC3511497; doi:10.1371/journal.pone.0049774), 2012-11-30
Supplement: pone.0049774.s017.pdf [file pone.0049774.s017.pdf]

**Table S8. Analysis of changes in the VDJ rearrangement pattern distribution by entropy in the young adults.**

| <b>isotypes</b> | <b>correlation</b> | <b>p-value</b> |
|-----------------|--------------------|----------------|
| IgA1            | 0.05655            | 0.89419        |
| IgA2            | 0.10641            | 0.80198        |
| IgD             | -0.24102           | 0.56528        |
| IgE             | 0.59089            | 0.40911        |
| IgG1            | -0.28189           | 0.49879        |
| IgG2            | -0.05481           | 0.89744        |
| IgG3            | -0.22140           | 0.59825        |
| IgG4            | -0.07953           | 0.88096        |
| IgM             | -0.58855           | 0.12482        |
