# Supplementary material for: Onset of Immune Senescence Defined by Unbiased Pyrosequencing of Human Immunoglobulin mRNA Repertoires
Source: PubMed Central journal article supplement (PMC3511497; doi:10.1371/journal.pone.0049774), 2012-11-30
Supplement: pone.0049774.s018.pdf [file pone.0049774.s018.pdf]

**Table S9. Analysis of changes in the VDJ rearrangement pattern distribution by entropy in the elderly.**

| <b>isotypes</b> | <b>correlation</b> | <b>p-value</b> |
|-----------------|--------------------|----------------|
| IgA1            | -0.74272           | 0.09077        |
| IgA2            | -0.64811           | 0.16395        |
| IgD             | 0.94074            | 0.00516        |
| IgE             | -0.67353           | 0.32647        |
| IgG1            | -0.31234           | 0.54673        |
| IgG2            | -0.92320           | 0.00862        |
| IgG3            | -0.40495           | 0.42578        |
| IgG4            | NA                 | NA             |
| IgM             | 0.84451            | 0.03439        |
