# Supplementary material for: Onset of Immune Senescence Defined by Unbiased Pyrosequencing of Human Immunoglobulin mRNA Repertoires
Source: PLoS One. 2012 Nov 30;7(11):e49774. doi: 10.1371/journal.pone.0049774 (PMC3511497; doi:10.1371/journal.pone.0049774)
Supplement: Table S6 — Unique VDJ recombination per isotype in proportion to all isotypes in elderly donors. (PDF) [file pone.0049774.s015.pdf]

**Table S6. Unique VDJ recombination per isotype in proportion to all isotypes in elderly donors.**

| isotypes        | correlation | p-value |
|-----------------|-------------|---------|
| IgA1            | -0.73945    | 0.09298 |
| IgA2            | -0.63579    | 0.17482 |
| IgD             | 0.95275     | 0.00330 |
| IgE             | -0.08037    | 0.89777 |
| IgG1            | -0.32645    | 0.52771 |
| IgG2            | -0.91184    | 0.01132 |
| IgG3            | -0.41907    | 0.40820 |
| IgG4            | 0.92849     | 0.24221 |
| IgM             | 0.93712     | 0.00581 |
| IgM + IgD       | 0.94895     | 0.00384 |
| IgA + IgE + IgG | -0.94895    | 0.00384 |

Correlations were calculated using the Pearson rank method and linear dependencies were evaluated by standard linear model fits. Significance of the intercept term was then quantified with an F-test.
